# Supplementary material for: Antibacterial Bicyclic Fatty Acids from a Korean Colonial Tunicate Didemnum sp
Source: MDPI journal article supplement (doi:10.3390/md19090521), 2021-09-16
Supplement: s1 [file s1]

# Supplementary Materials

## Antibacterial Bicyclic Fatty Acids from a Korean Colonial Tunicate *Didemnum* sp.

Hiyoung Kim<sup>1,2</sup>, Jusung Lee<sup>2</sup>, Tae Gu Lee<sup>3</sup>, Inho Yang<sup>4</sup>, Jungwook Chin<sup>5</sup>, Boon Jo Rho<sup>6</sup>, Hyukjae Choi<sup>7</sup>, Sang-Jip Nam<sup>8</sup>, Dongyup Hahn<sup>9,10,\*</sup> and Heonjoong Kang<sup>2,10,11,\*</sup>

<sup>1</sup>Department of Biomedical Science and Engineering, Konkuk University, Seoul 05029, Korea

<sup>2</sup>Laboratory of Marine Drugs, School of Earth and Environmental Sciences, Seoul National University, NS-80, Seoul 08826, Korea

<sup>3</sup>Safety Research Team, Crop Protection Research Institute, FarmHannong Co., Ltd, Nonsan 33010, Korea

<sup>4</sup>Department of Convergence Study on the Ocean Science and Technology, Korea Maritime and Ocean University, Busan 49112, Korea

<sup>5</sup>New Drug Development Center, Daegu-Gyeongbuk Medical Innovation Foundation, Daegu, 41061, Korea

<sup>6</sup>Natural History Museum, Ewha Womans University, Seoul 03760, Korea

<sup>7</sup>College of Pharmacy, Yeungnam University, Gyeongsan 38541, Korea

<sup>8</sup>Department of Chemistry and Nano Science, Ewha Womans University, Seoul 03760, Korea

<sup>9</sup>School of Food Science and Biotechnology & Department of Integrative Biology, Kyungpook National University, Daegu 41566, Korea

<sup>10</sup>Interdisciplinary Graduate Program in Genetic Engineering, Seoul National University, NS-80, Seoul 08826, Korea

<sup>11</sup>Research Institute of Oceanography, Seoul National University, Seoul 08826, Korea

\* Correspondence: dohahn@knu.ac.kr; Tel.: +82-53-950-5756 (D.H.)  
hjkang@snu.ac.kr; Tel.: +82-2-880-5730 (H.K.)

# Table of Contents

**Figure S1.**  $^1\text{H}$  NMR spectrum of compound **1** in methanol- $d_4$

**Figure S2.**  $^{13}\text{C}$  NMR spectrum of compound **1** in methanol- $d_4$

**Figure S3.** COSY spectrum of compound **1** in methanol- $d_4$

**Figure S4.** HSQC spectrum of compound **1** in methanol- $d_4$

**Figure S5.** HMBC spectrum of compound **1** in methanol- $d_4$

**Figure S6.** NOESY spectrum of compound **1** in methanol- $d_4$

**Figure S7.**  $^1\text{H}$  NMR spectrum of compound **2** in methanol- $d_4$

**Figure S8.**  $^{13}\text{C}$  NMR spectrum of compound **2** in methanol- $d_4$

**Figure S9.**  $^1\text{H}$  NMR spectrum of compound **3** in methanol- $d_4$

**Figure S10.**  $^{13}\text{C}$  NMR spectrum of compound **3** in methanol- $d_4$

**Figure S11.**  $^1\text{H}$  NMR spectrum of compound **4** in methanol- $d_4$

**Figure S12.**  $^{13}\text{C}$  NMR spectrum of compound **4** in methanol- $d_4$

**Figure S13.**  $^1\text{H}$  NMR spectrum of compound **5** in methanol- $d_4$

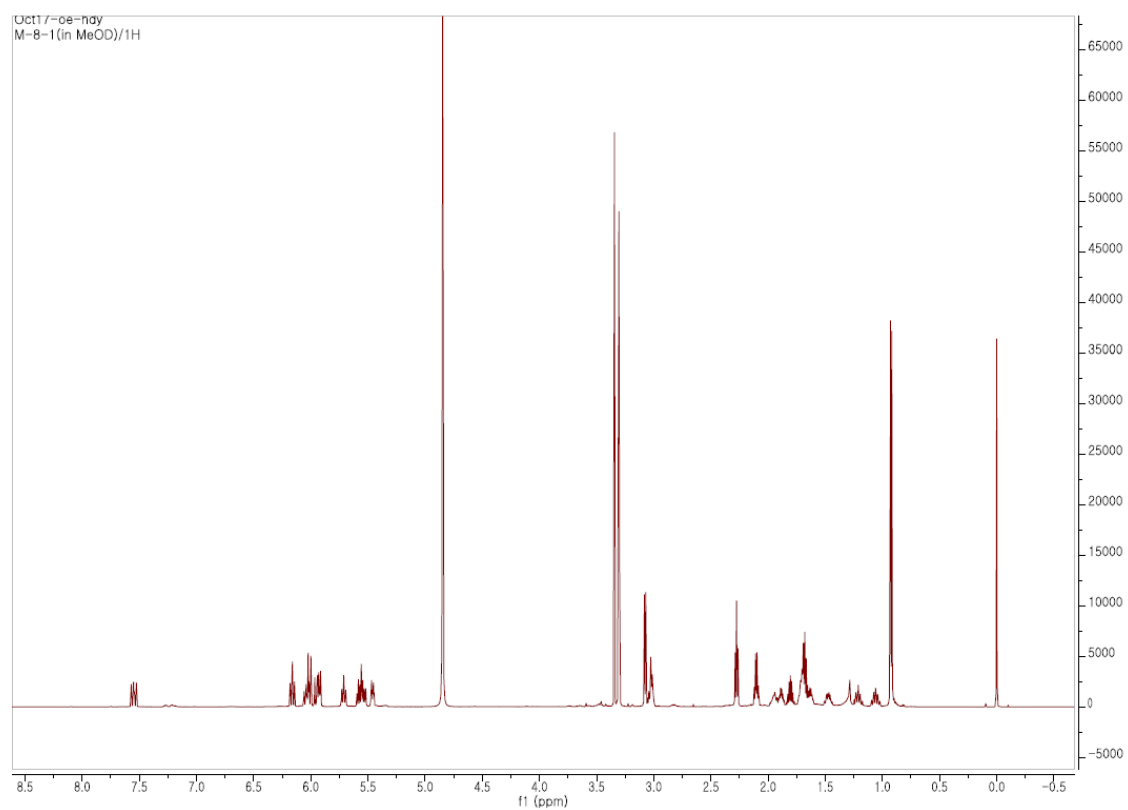

**Figure S1.**  $^1\text{H}$  NMR spectrum of compound **1** in methanol- $d_4$

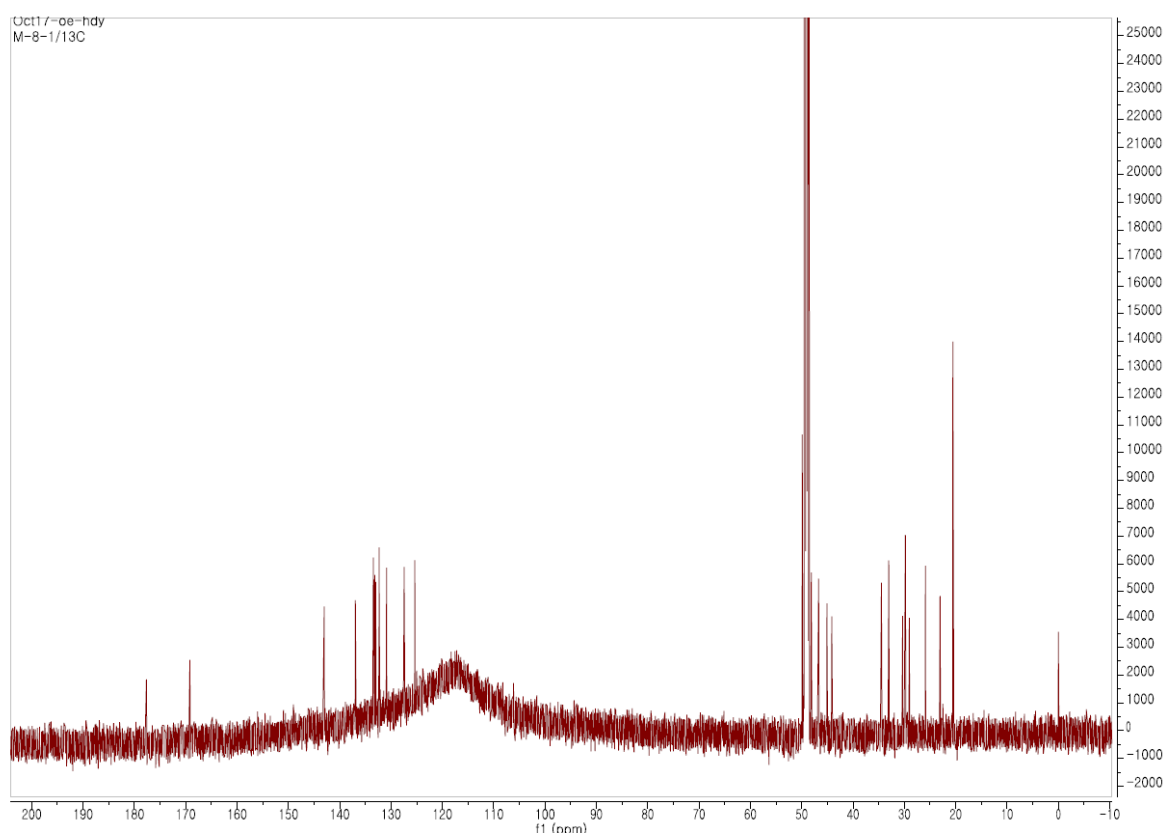

**Figure S2.**  $^{13}\text{C}$  NMR spectrum of compound **1** in methanol- $d_4$

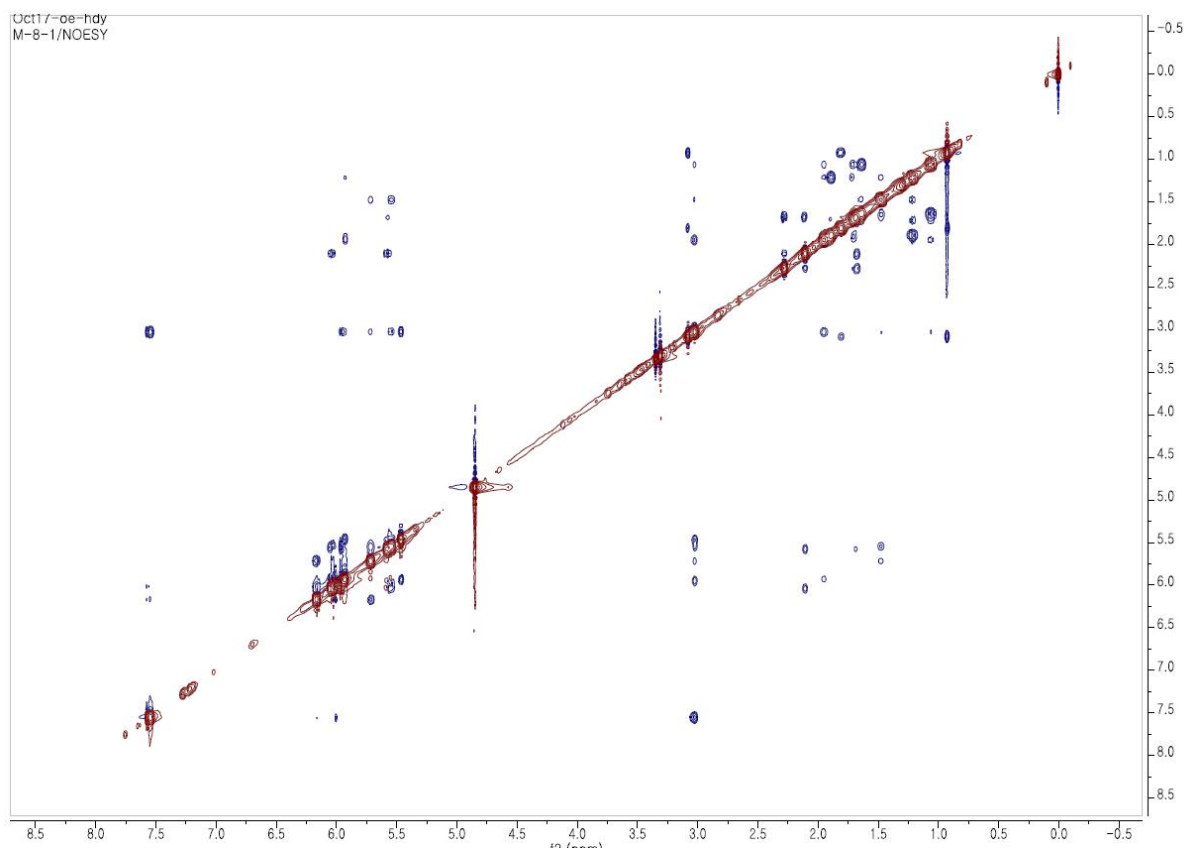

**Figure S3.** COSY spectrum of compound **1** in methanol- $d_4$

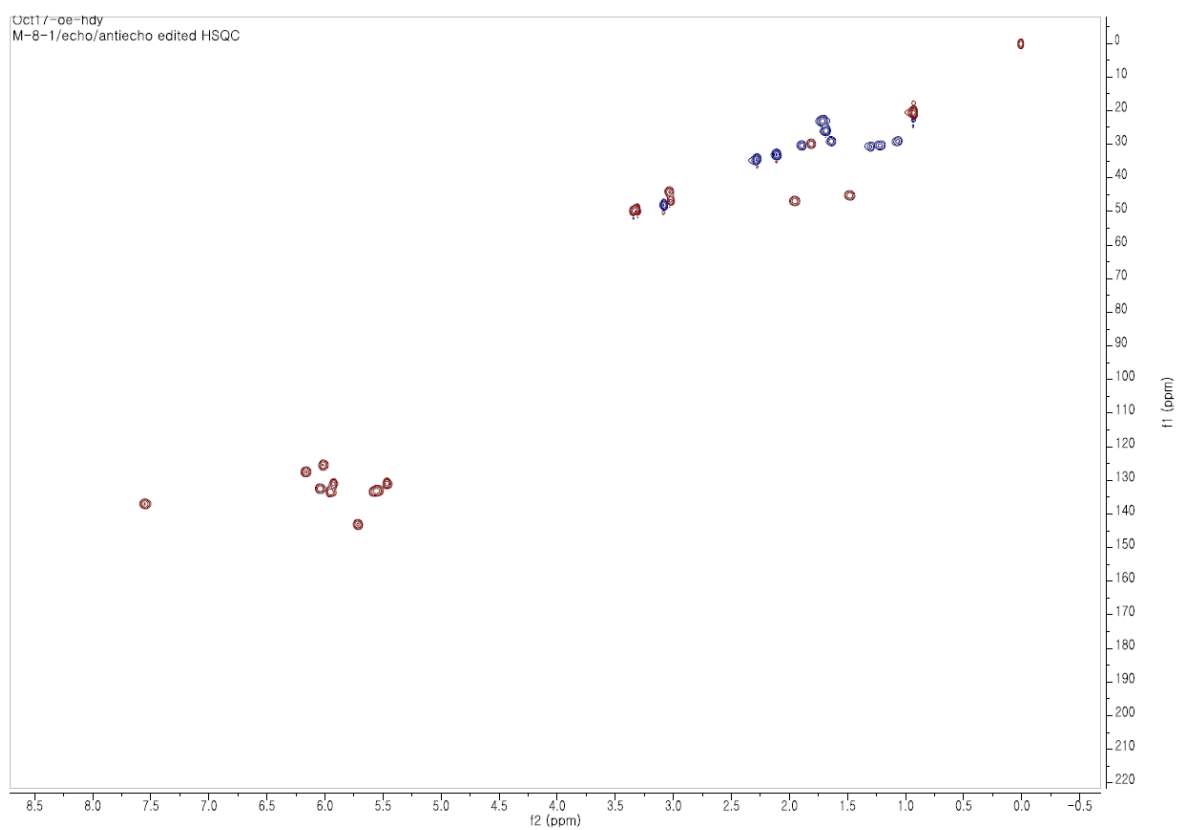

**Figure S4.** HSQC spectrum of compound **1** in methanol- $d_4$

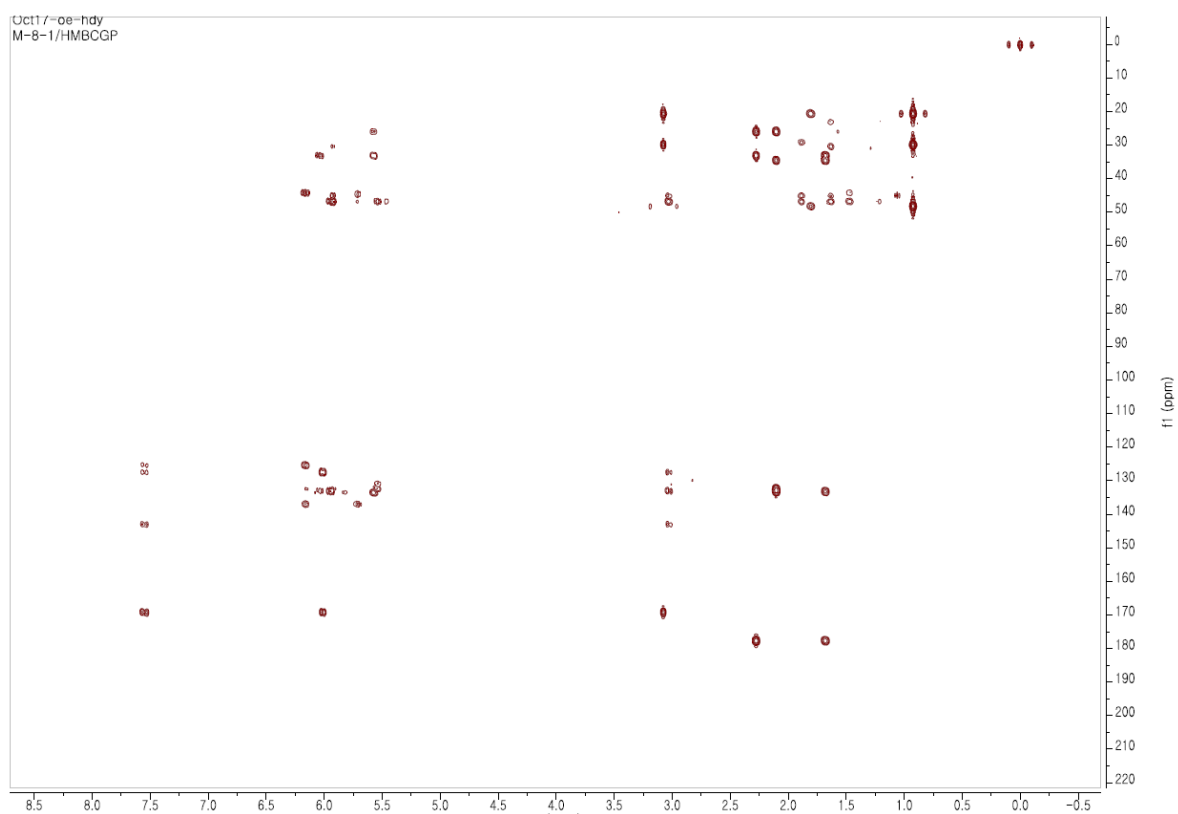

**Figure S5.** HMBC spectrum of compound **1** in methanol-*d*<sub>4</sub>

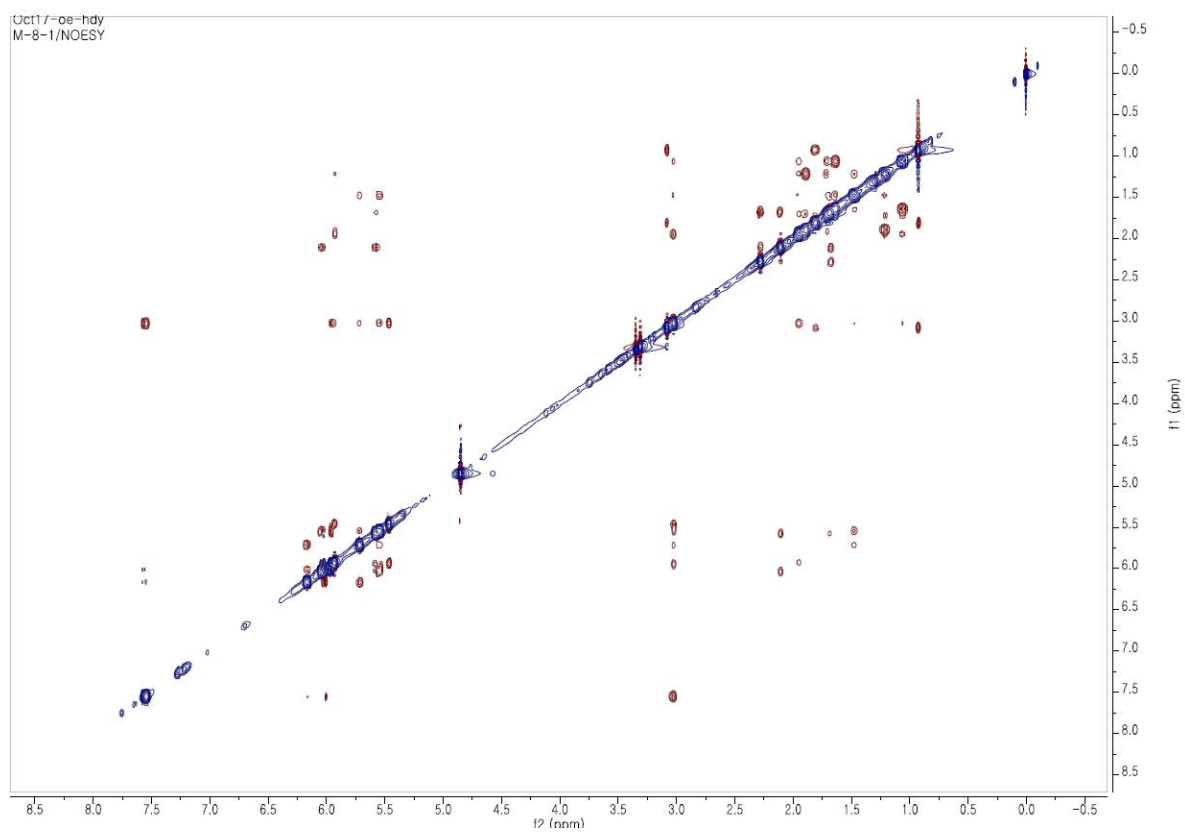

**Figure S6.** NOESY spectrum of compound **1** in methanol-*d*<sub>4</sub>



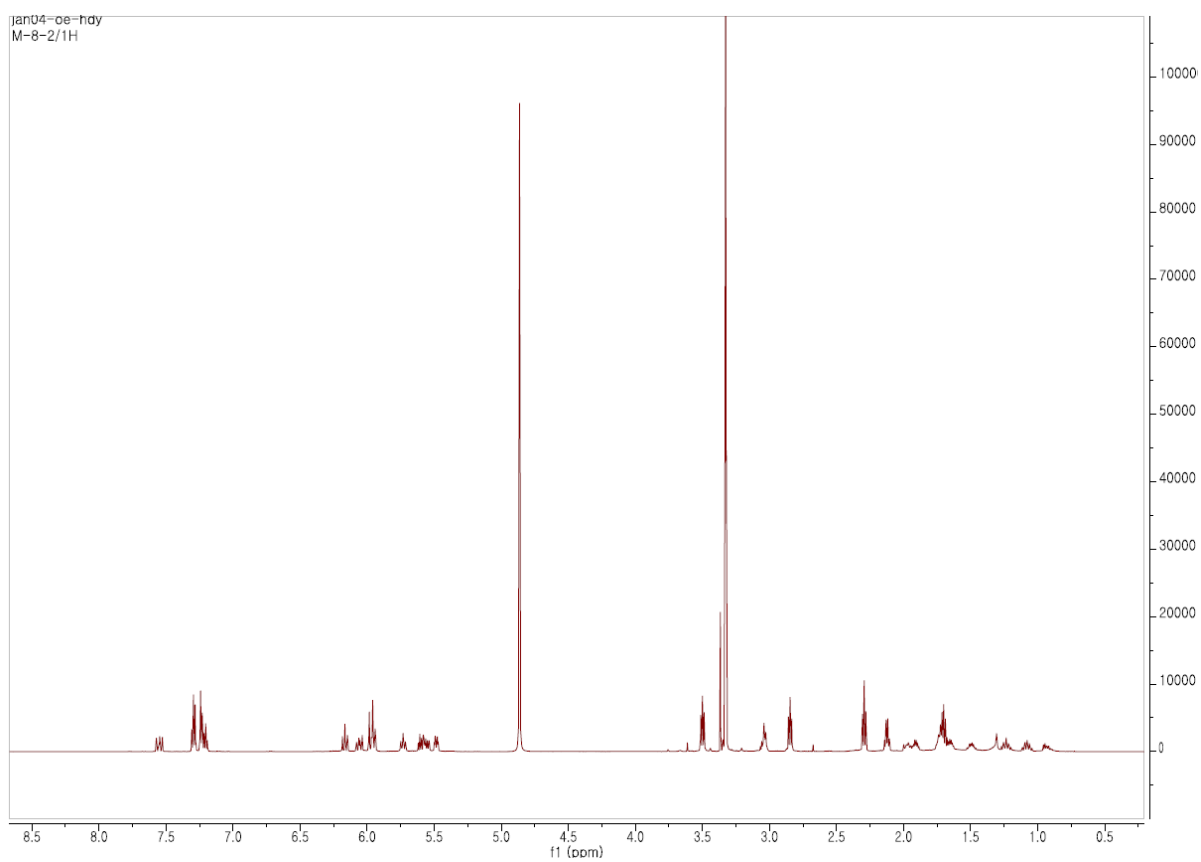

**Figure S7.**  $^1\text{H}$  NMR spectrum of compound 2 in methanol- $d_4$

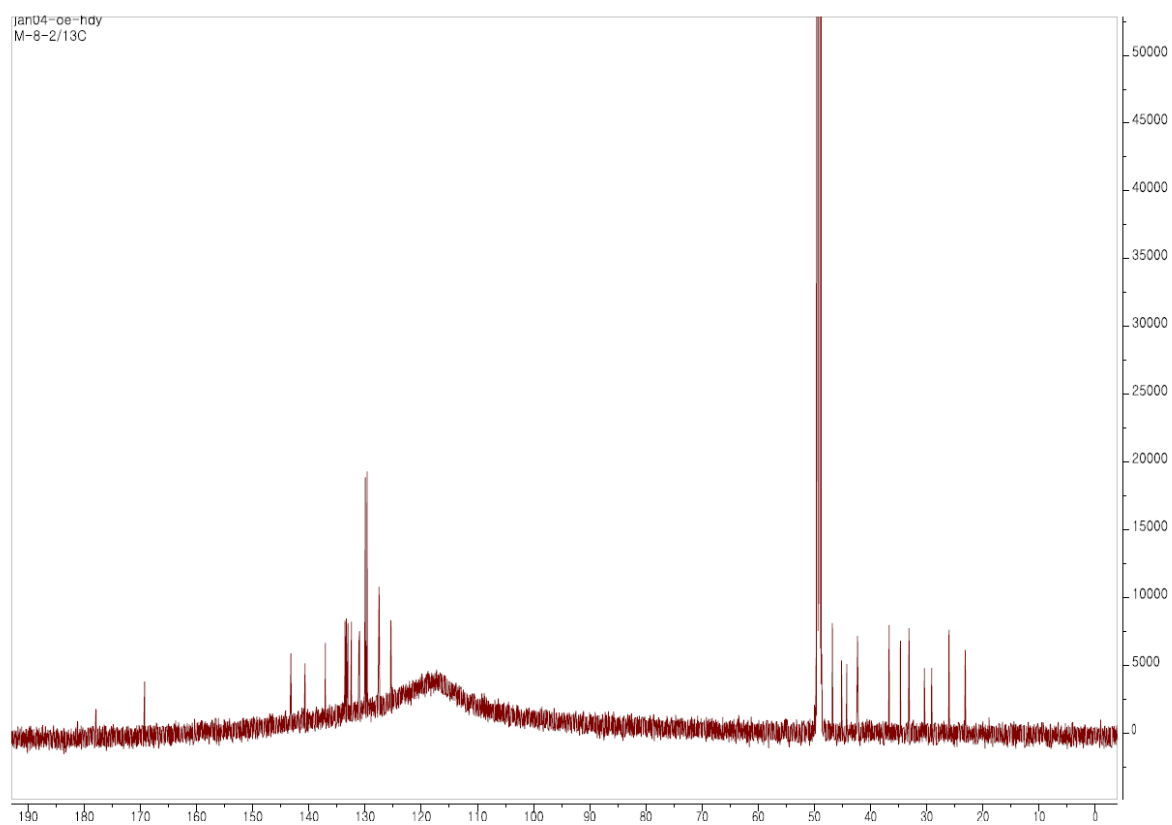

**Figure S8.**  $^{13}\text{C}$  NMR spectrum of compound **2** in methanol- $d_4$

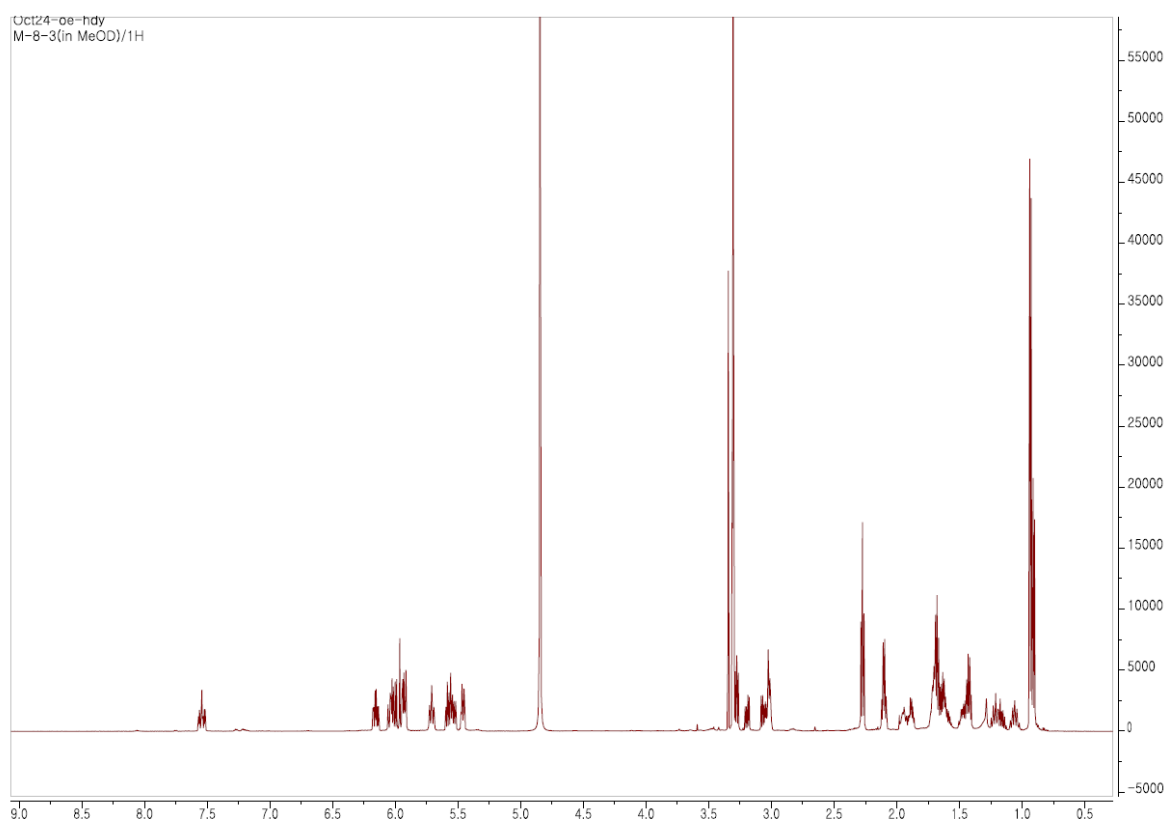

**Figure S9.**  $^1\text{H}$  NMR spectrum of compound 3 in methanol- $d_4$

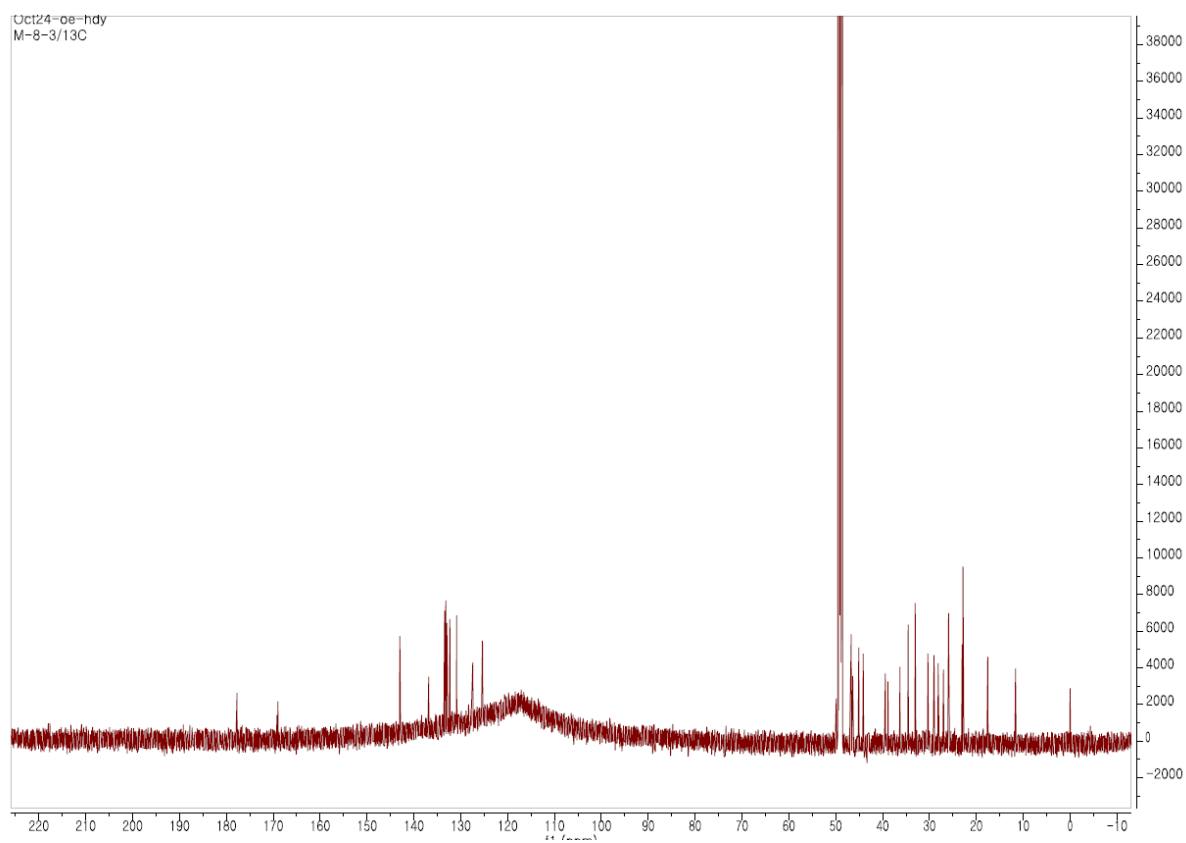

**Figure S10.**  $^{13}\text{C}$  NMR spectrum of compound **3** in methanol- $d_4$

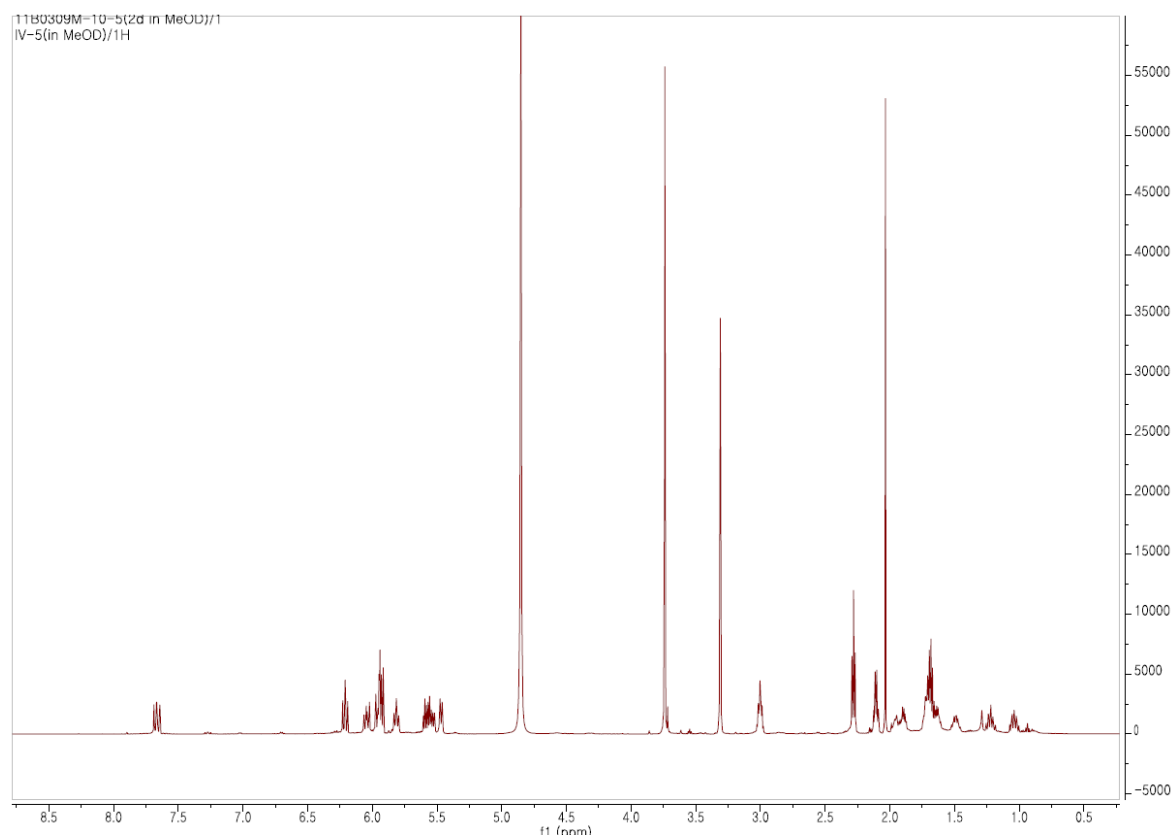

**Figure S11.** <sup>1</sup>H NMR spectrum of compound 4 in methanol-*d*<sub>4</sub>

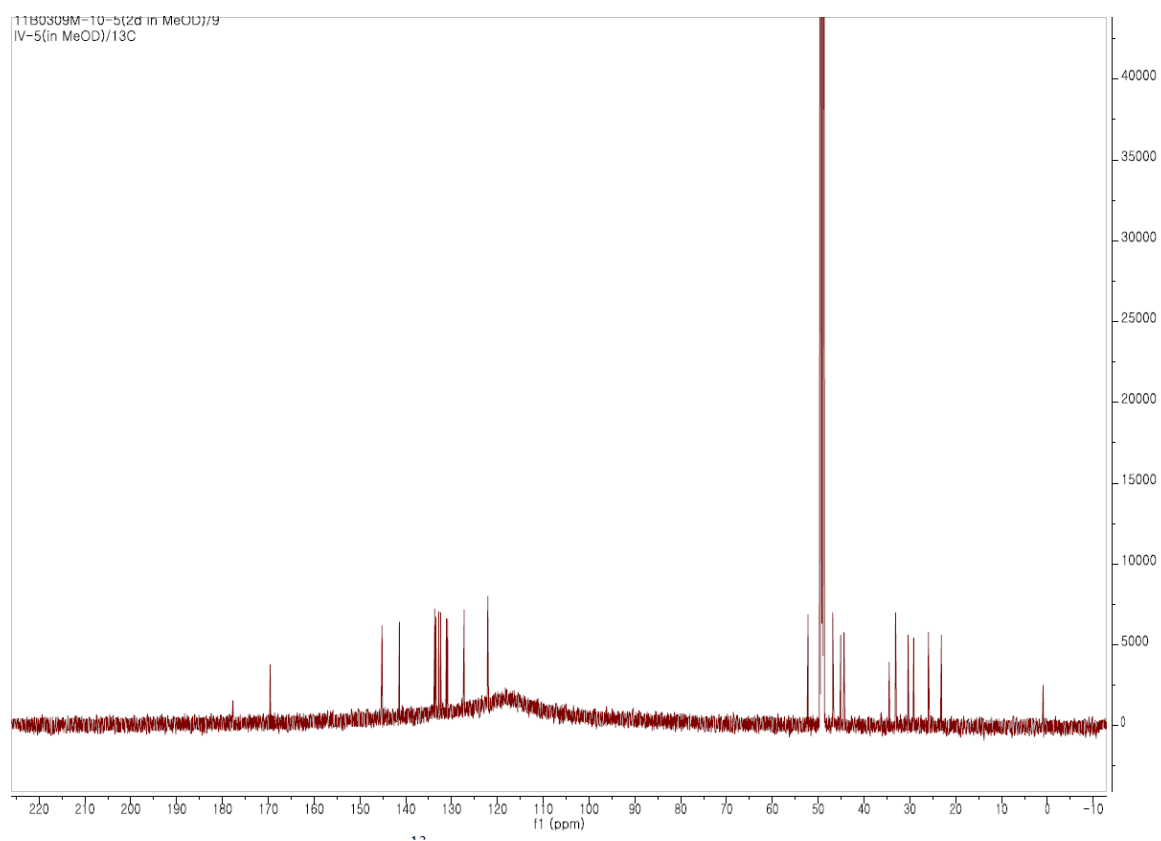

**Figure S12.**  $^{13}\text{C}$  NMR spectrum of compound **4** in methanol- $d_4$

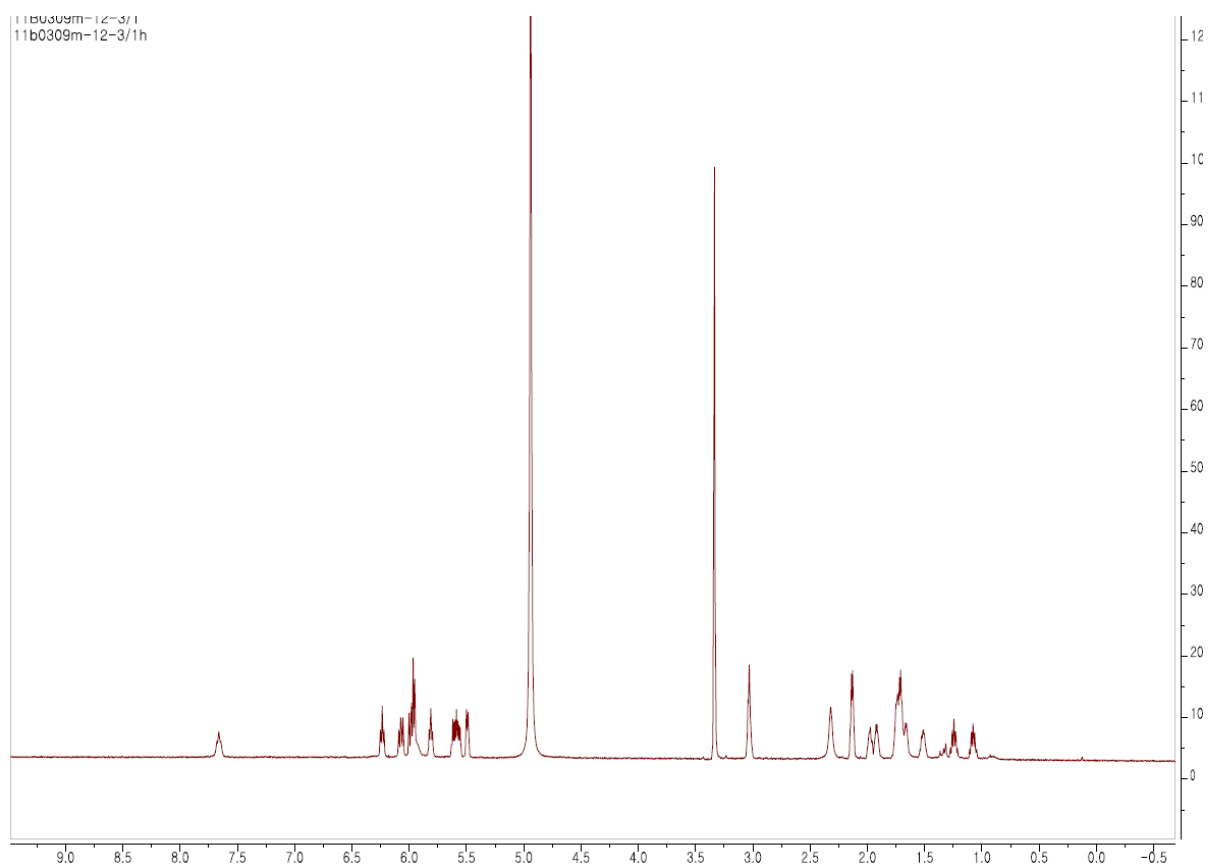

**Figure S13.**  $^1\text{H}$  NMR spectrum of compound **5** in methanol- $d_4$
